# Supplementary material for: Expanding the utility of flow hydrogenation – a robust protocol restricting hydrodehalogenation
Source: Royal Society of Chemistry journal article supplement (doi:10.1039/c4ra09605c), 2014-01-01

## Supplementary Data

### Supplementary Data For Expanding the Utility of Flow Hydrogenation – A Robust Protocol Restricting Hydrodehalogenation

Lacey Hizartzidis,<sup>a</sup> Peter J. Cossar,<sup>a</sup> Mark J. Robertson,<sup>a</sup> Michela I. Simone,<sup>a</sup> Kelly A. Young,<sup>a</sup> Adam McCluskey<sup>a\*</sup>, Christopher P. Gordon<sup>a,b\*</sup>

#### Abstract

A commonly observed limitation of conducting hydrogenations under flow chemistry conditions is hydrodehalogenation. In a bid to circumvent this limitation a series of hydrogenation catalysts were screened, with 5 % Pt/C (sulfided) catalyst identified as an effective catalyst to selectively effect reductive aminations, nitro reduction, and alkene reductions in the presence of halogen atoms. Additionally the optimised protocol to effect reductive aminations, which utilised the ThalesNano H-cube pro™, cleanly reduced an imine functionality in the presence of furan moiety indicating potential amenability with other labile functionalities.

<sup>a</sup>Chemistry, Centre for Chemical Biology, The University of Newcastle, University Drive, Callaghan, NSW 2308 Australia.

<sup>b</sup>Nanoscale Organisation and Dynamics Group, School of Science and Health, University of Western Sydney, Campbelltown Campus, Locked Bag, 1797, Penrith South DC, Australia, E-mail: c.gordon@uws.edu.au, Fax: +61 (02) 4620 3201, Tel: +61 (02) 4620 3201.

#### GRAPHICAL ABSTRACT

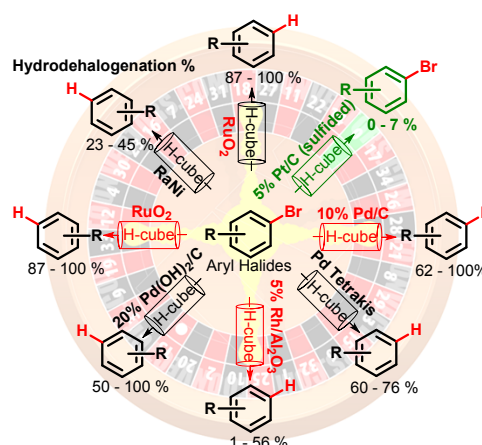

#### Supporting Information

1. GC-MS Traces
2. NMR Spectra

ii

xi

## 1. GCMS Data

Gas chromatography-mass spectrometry (GC-MS) was performed using a Shimadzu GC-MS QF2010 EI/NCI System fitted with a ZB-5MS column [30 m x 0.25 mm], 5% phenyl-arylene stationary phase. The injector temperature was set at 250 °C and an oven program starting at 160 °C, with a hold time of 1 min. The temperature was then rapidly increased to 230 °C (35 °C/min) and it was held for 18.5 – 22 min. The flow rate was set at 23mL/min, with a column flow rate of 0.95 mL/min.

**Table S1:** Details of compounds including molecular weight and retention times observed in GC-MS traces (A – K, Table S2).

| Compound | Structure                                                                                                                                                            | Retention Time (mins) |
|----------|----------------------------------------------------------------------------------------------------------------------------------------------------------------------|-----------------------|
| 7        | 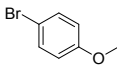<br>Chemical Formula: C <sub>7</sub> H <sub>7</sub> BrO<br>Molecular Weight: 187.03 | 2.15                  |
| 10       | <br>Chemical Formula: C <sub>7</sub> H <sub>8</sub> O<br>Molecular Weight: 108.14   | 1.61                  |

**Table S2:** Evaluation of commercially available catalysts for the hydrogenation of **7** at 1.0 mL.min<sup>-1</sup> flow rate, 50 °C, 50 bar H<sub>2</sub>. Reactions were conducted for 10 minutes and analysed using GC-MS.

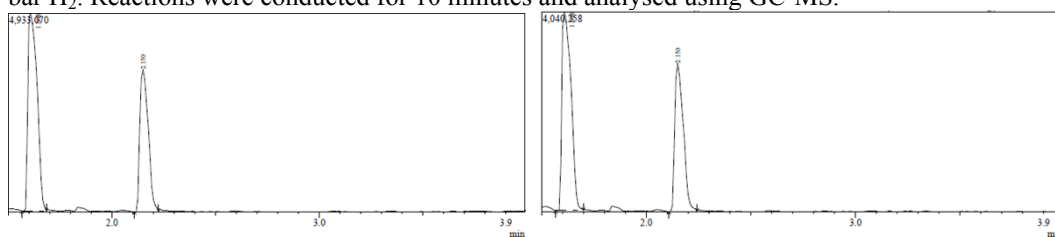

A. Entry 1, Table 1

B. Entry 2, Table 1

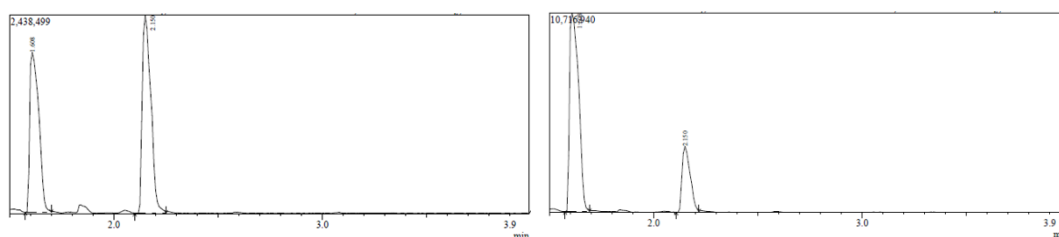

C. Entry 3, Table 1

D. Entry 4, Table 1

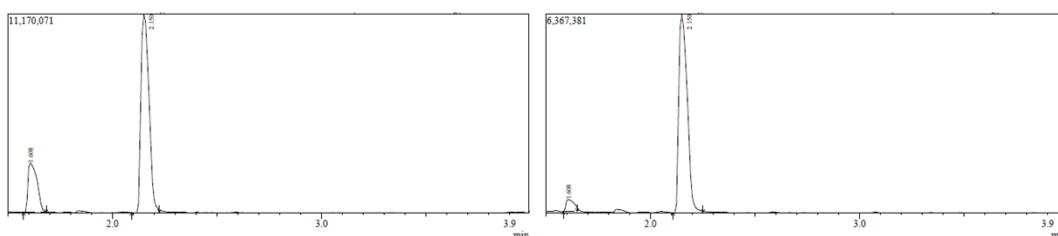

E. Entry 5, Table 1

F. Entry 6, Table 1

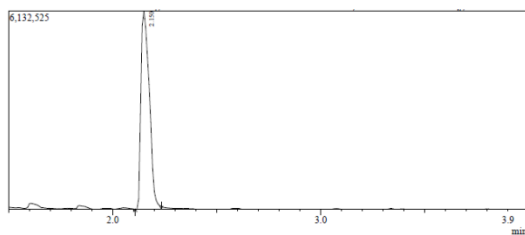

G. Entry 7, Table 1

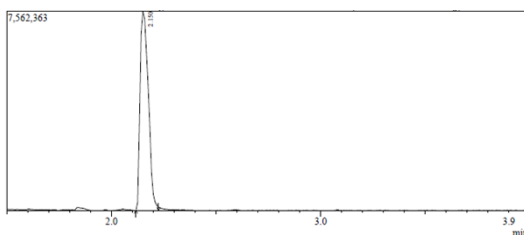

H. Entry 8, Table 1

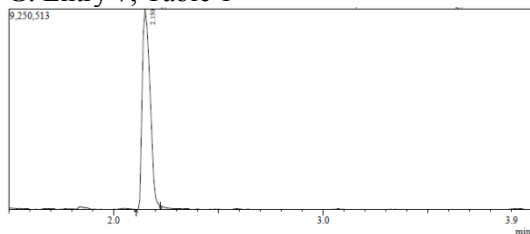

I. Entry 9, Table 1

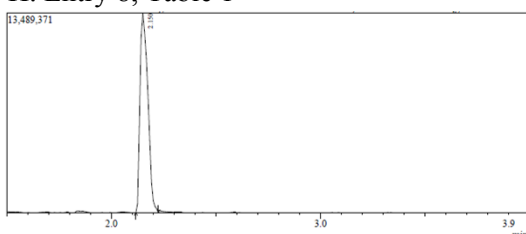

J. Entry 10, Table 1

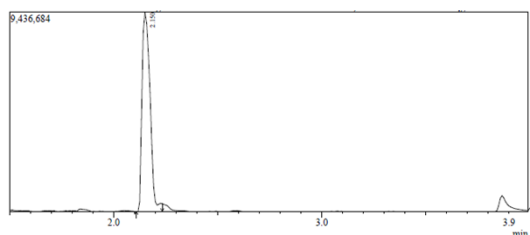

K. Entry 11, Table 1

**Table S3:** Details of compounds including molecular weight and retention times observed in GC-MS traces (A-K, Table S4).

| Compound  | Structure                                                                                                                                         | Retention Time (mins) |
|-----------|---------------------------------------------------------------------------------------------------------------------------------------------------|-----------------------|
| <b>8</b>  | 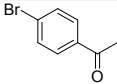<br>Chemical Formula: $C_8H_7BrO$<br>Molecular Weight: 199.04  | 2.54                  |
| <b>11</b> | <br>Chemical Formula: $C_8H_9BrO$<br>Molecular Weight: 201.06  | 2.61                  |
| <b>12</b> | <br>Chemical Formula: $C_8H_8O$<br>Molecular Weight: 120.15    | 1.86                  |
| <b>13</b> | <br>Chemical Formula: $C_8H_{10}O$<br>Molecular Weight: 122.16 | 1.73                  |

**Table S4:** Evaluation of commercially available catalysts for the hydrogenation of **8** at 1.0 mL.min<sup>-1</sup> flow rate, 50 °C, 50 bar H<sub>2</sub>. Reactions were conducted for 10 minutes and analysed using GC-MS.

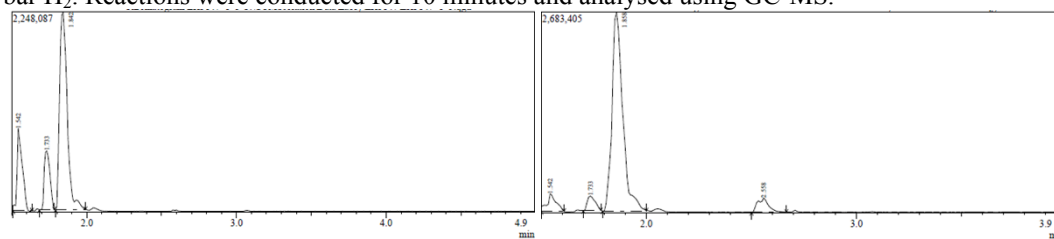

A. Entry 1, Table 2

B. Entry 2, Table 2

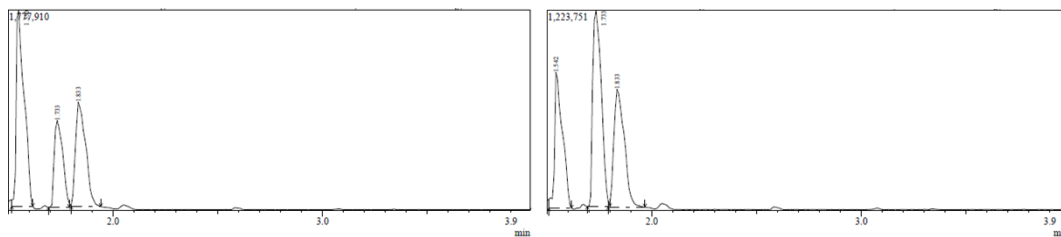

C. Entry 3, Table 2

D. Entry 4, Table 2

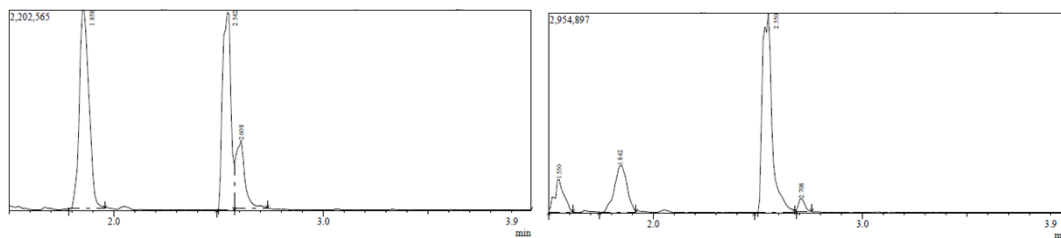

E. Entry 5, Table 2

F. Entry 6, Table 2

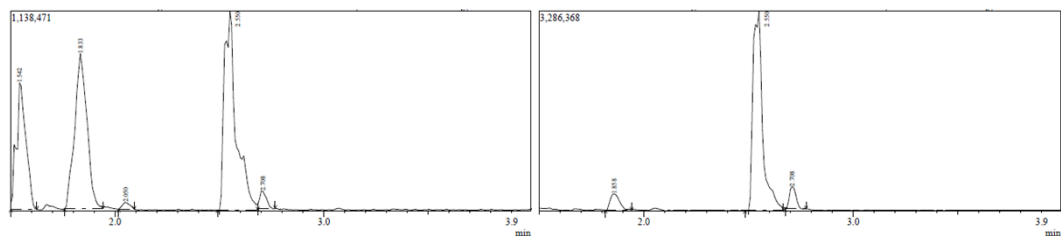

G. Entry 7, Table 2

H. Entry 8, Table 2

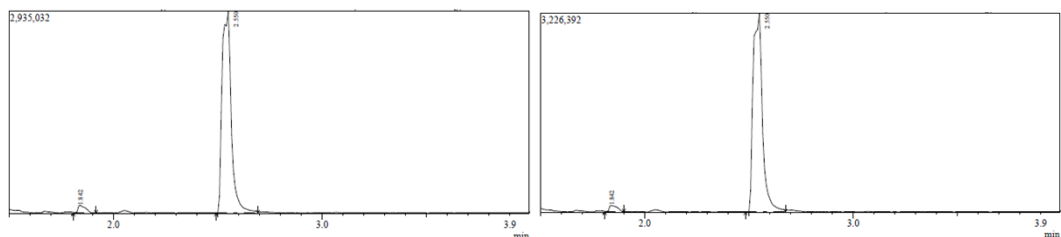

I. Entry 9, Table 2

J. Entry 10, Table 2

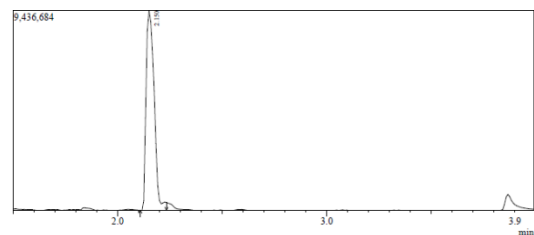

K. Entry 11, Table 2

**Table S5:** Details of compounds including molecular weight and retention times observed in GC-MS traces (A – K, Table S6).

| Compound | Structure                                                                                                                                                            | Retention Time (mins) |
|----------|----------------------------------------------------------------------------------------------------------------------------------------------------------------------|-----------------------|
| 9        | 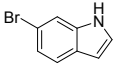<br>Chemical Formula: C <sub>8</sub> H <sub>6</sub> BrN<br>Molecular Weight: 196.04 | 3.88                  |
| 14       | <br>Chemical Formula: C <sub>8</sub> H <sub>6</sub> BrN<br>Molecular Weight: 198.06 | 3.45                  |
| 15       | <br>Chemical Formula: C <sub>8</sub> H <sub>7</sub> N<br>Molecular Weight: 117.15   | 2.47                  |
| 16       | <br>Chemical Formula: C <sub>8</sub> H <sub>8</sub> N<br>Molecular Weight: 119.16   | 2.23                  |

**Table S6:** Evaluation of commercially available catalysts for the hydrogenation of **9** at 1.0 mL.min<sup>-1</sup> flow rate, 50 °C, 50 bar H<sub>2</sub>. Reactions were conducted for 10 minutes and analysed using GC-MS.

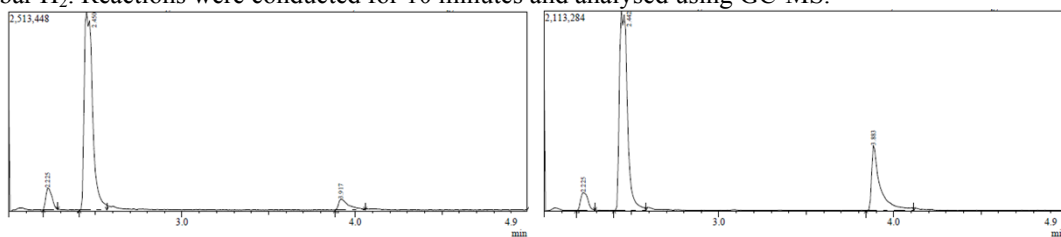

A. Entry 1, Table 3

B. Entry 2, Table 3

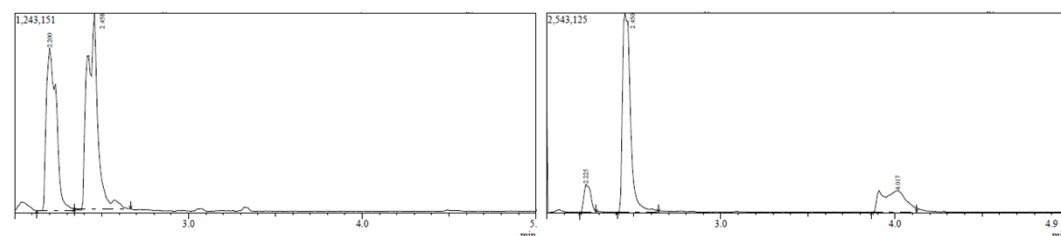

C. Entry 3, Table 3

D. Entry 4, Table 3

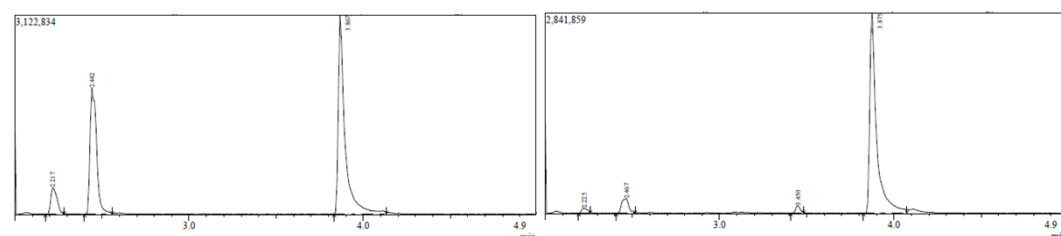

E. Entry 5, Table 3

F. Entry 6, Table 3

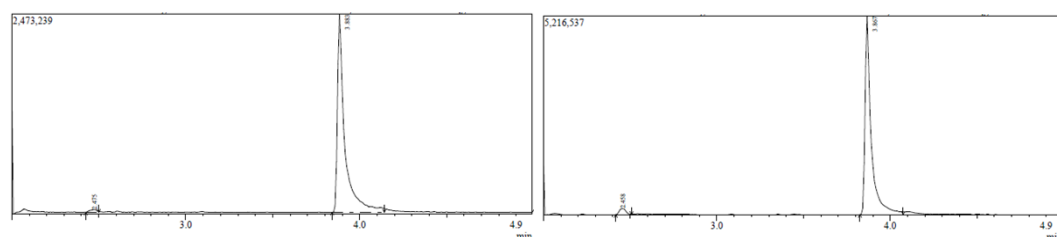

G. Entry 7, Table 3

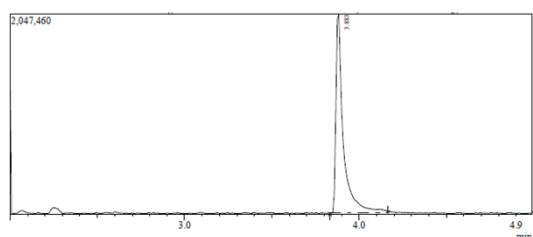

H. Entry 8, Table 3

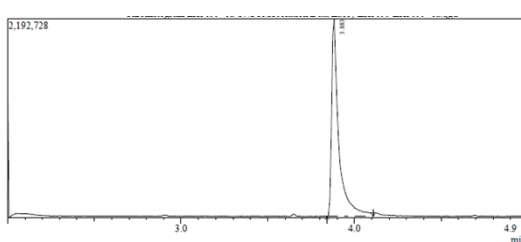

I. Entry 9, Table 3

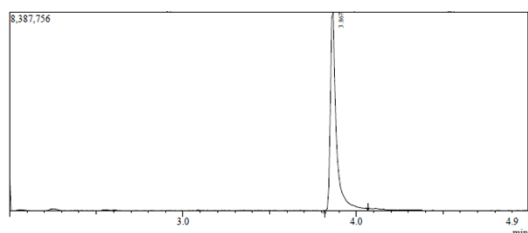

J. Entry 10, Table 3

K. Entry 11, Table 3

**Table S7:** Details of compounds including molecular weight and retention times observed in GC-MS traces (A – E, Table S8).

| Compound | Structure                                                                           | Retention Time (mins) |
|----------|-------------------------------------------------------------------------------------|-----------------------|
| 17       | <p>Chemical Formula: <math>C_7H_5BrO</math><br/>Molecular Weight: 185.02</p>        | 2.61                  |
| 18       | <p>Chemical Formula: <math>C_7H_9N</math><br/>Molecular Weight: 107.15</p>          | 1.80                  |
| 22       | <p>Chemical Formula: <math>C_{14}H_{12}BrN</math><br/>Molecular Weight: 274.16</p>  | 8.08                  |
| 21       | <p>Chemical Formula: <math>C_{14}H_{13}N</math><br/>Molecular Weight: 195.26</p>    | 4.49                  |
| 24       | <p>Chemical Formula: <math>C_7H_8O</math><br/>Molecular Weight: 108.14</p>          | 1.81                  |
| 26       | <p>Chemical Formula: <math>C_{14}H_{15}N</math><br/>Molecular Weight: 197.28</p>    | 4.33                  |
| 4        | <p>Chemical Formula: <math>C_{12}H_{12}BrNO</math><br/>Molecular Weight: 266.13</p> |                       |

**Table S8:** Evaluation of hydrogenation reactions in Scheme 3 - 6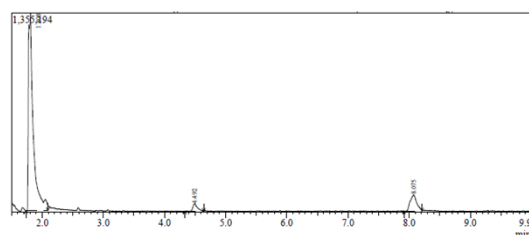**A. Scheme 3 results**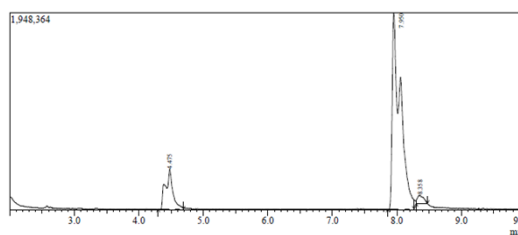**B. Scheme 4 results**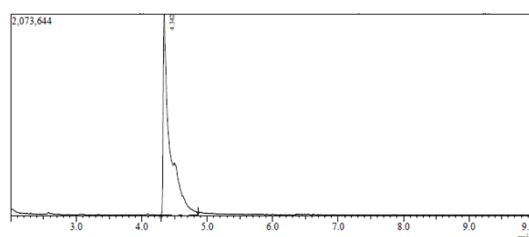**C. Scheme 5 – 10% Pd/C**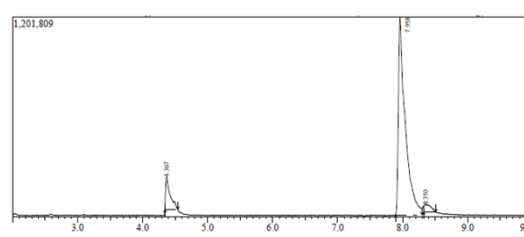**D. Scheme 5 – 5% Pt/C (sulfided)**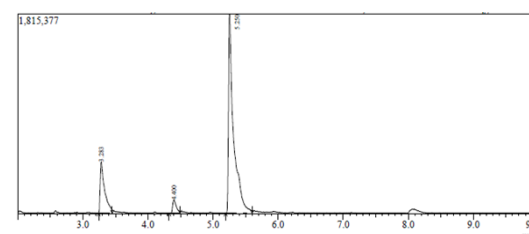**E. Scheme 6 results****Table S9:** Details of compounds including molecular weight and retention times observed in GC-MS traces (A-C, Table S8 and S9).

| Compound | Structure                                                                                                                                                                            | Retention Time (mins) |
|----------|--------------------------------------------------------------------------------------------------------------------------------------------------------------------------------------|-----------------------|
| 27       | 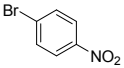<br>Chemical Formula: C <sub>6</sub> H <sub>4</sub> BrNO <sub>2</sub><br>Molecular Weight: 202.01 | 2.57                  |
| 28       | <br>Chemical Formula: C <sub>6</sub> H <sub>6</sub> BrN<br>Molecular Weight: 172.02               | 2.46                  |
| 29       | <br>Chemical Formula: C <sub>6</sub> H <sub>7</sub> N<br>Molecular Weight: 93.13                  | 1.71                  |

**Table S10:** Evaluation of hydrogenation catalysts for selective nitro reduction, conditions were set to 1.0 mL.min<sup>-1</sup> flow rate, 30 °C, 30 bar H<sub>2</sub>. Reactions were conducted for 10 minutes and analysed using GC-MS.

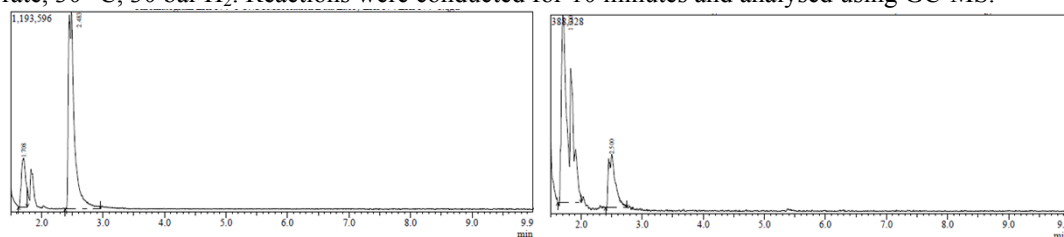

A. Entry 1, Table 4

B. Entry 2, Table 4 ( 10% Pd/C)

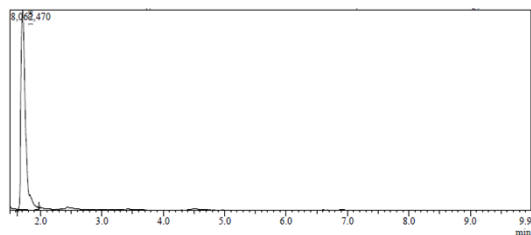

C. Entry 3, Table 4

**Table S11:** Evaluation of residence time for selective nitro reduction, conditions were set to 30 °C, 30 bar H<sub>2</sub> and variable flow rate. Reactions were conducted for 10 minutes and analysed using GC-MS.

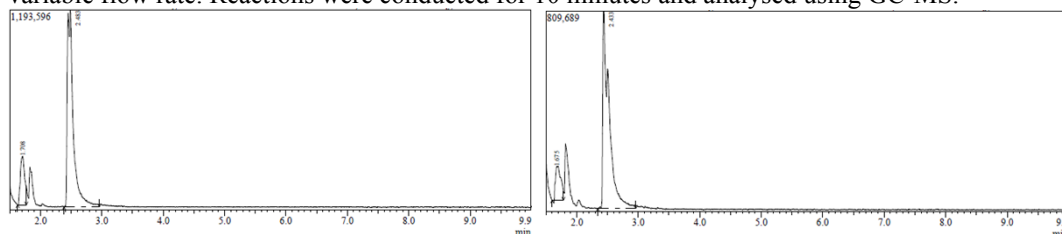

A. Entry 1, Table 5

B. Entry 2, Table 5

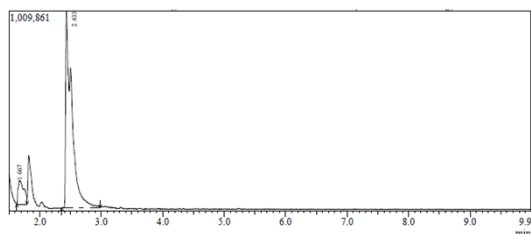

C. Entry 3, Table 5



## 2. NMR Spectra

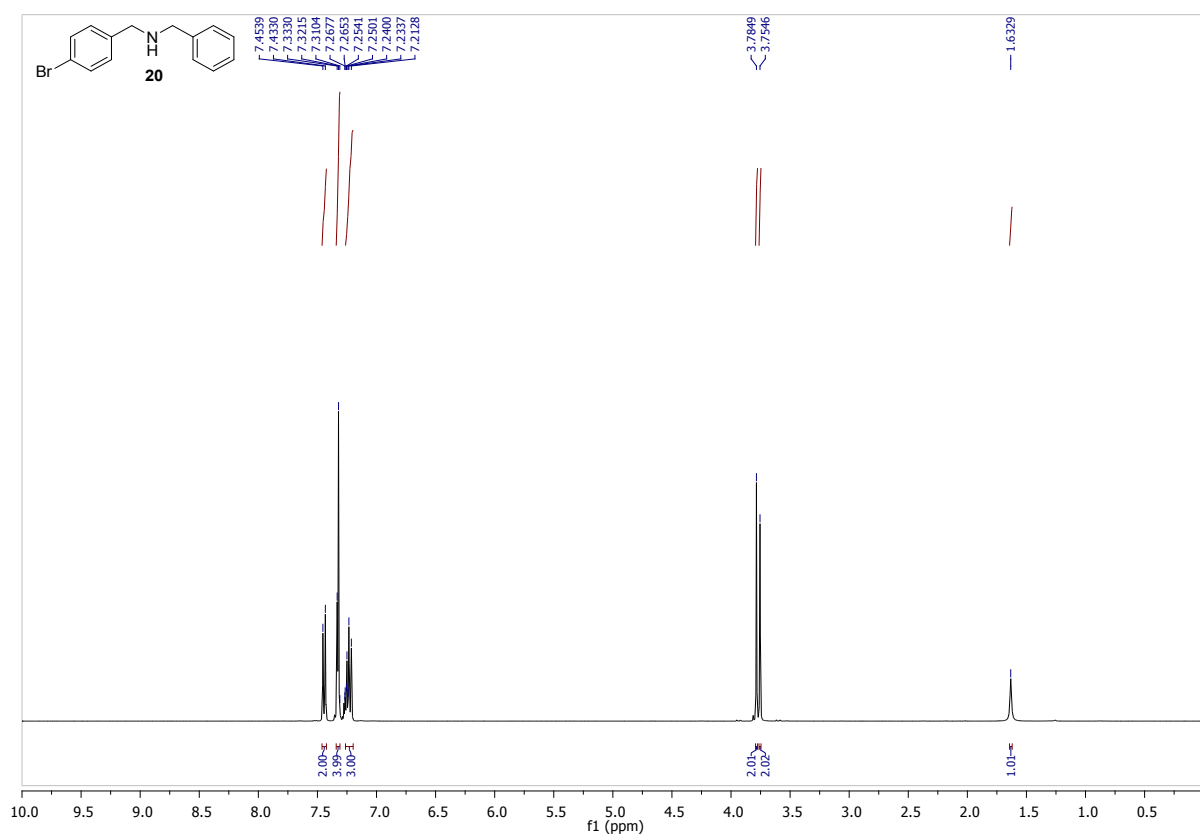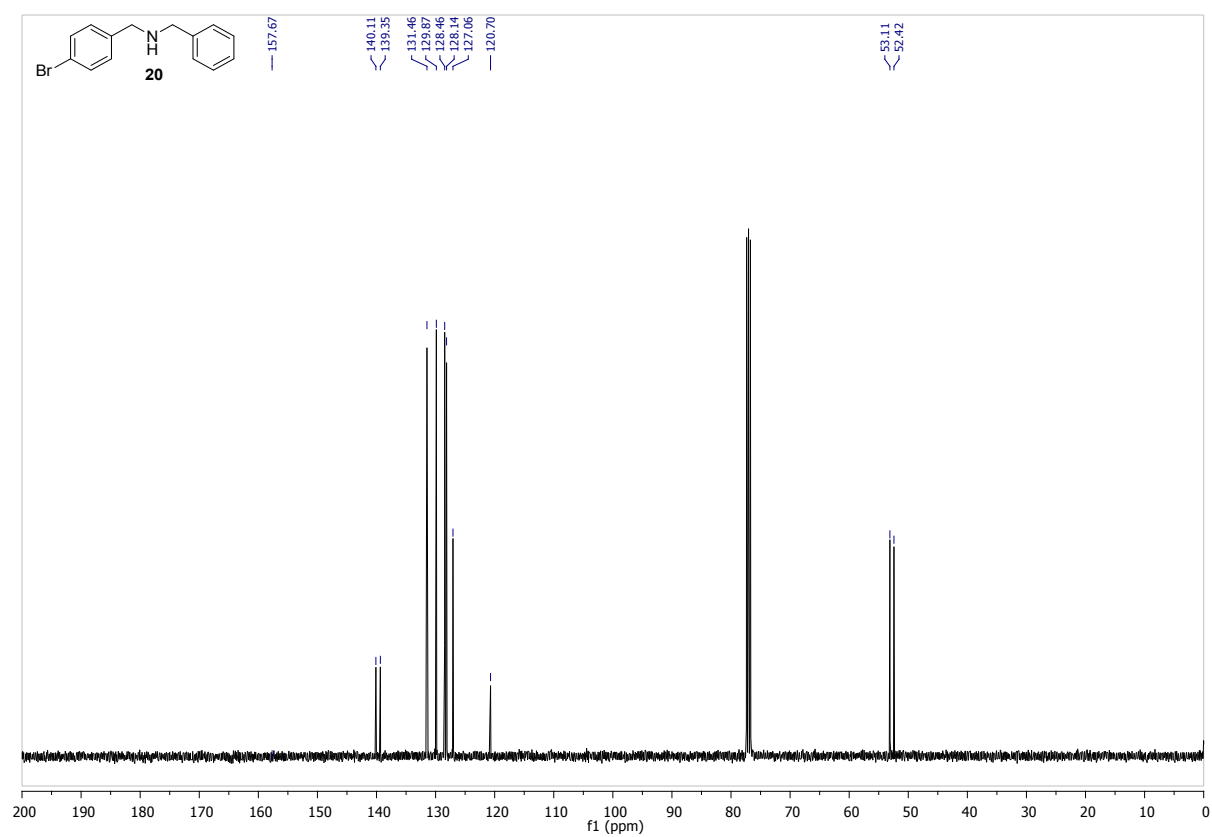

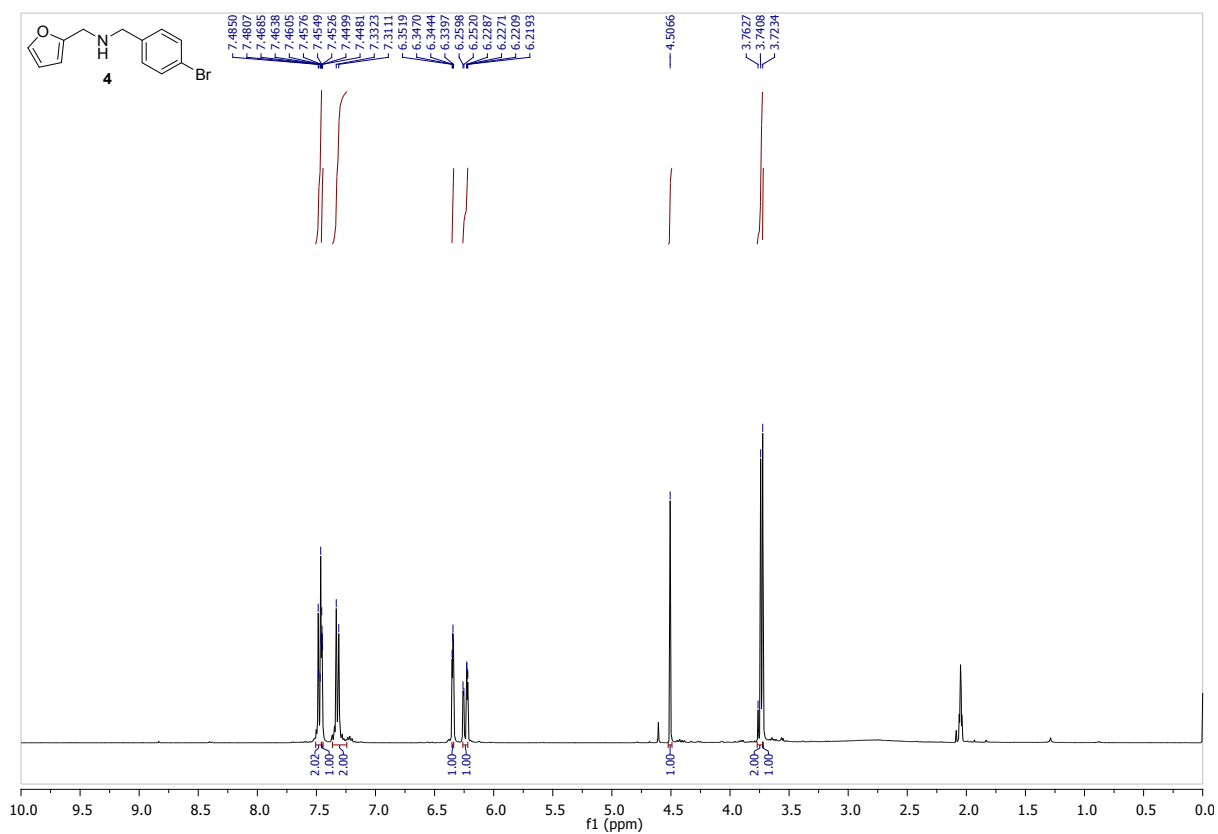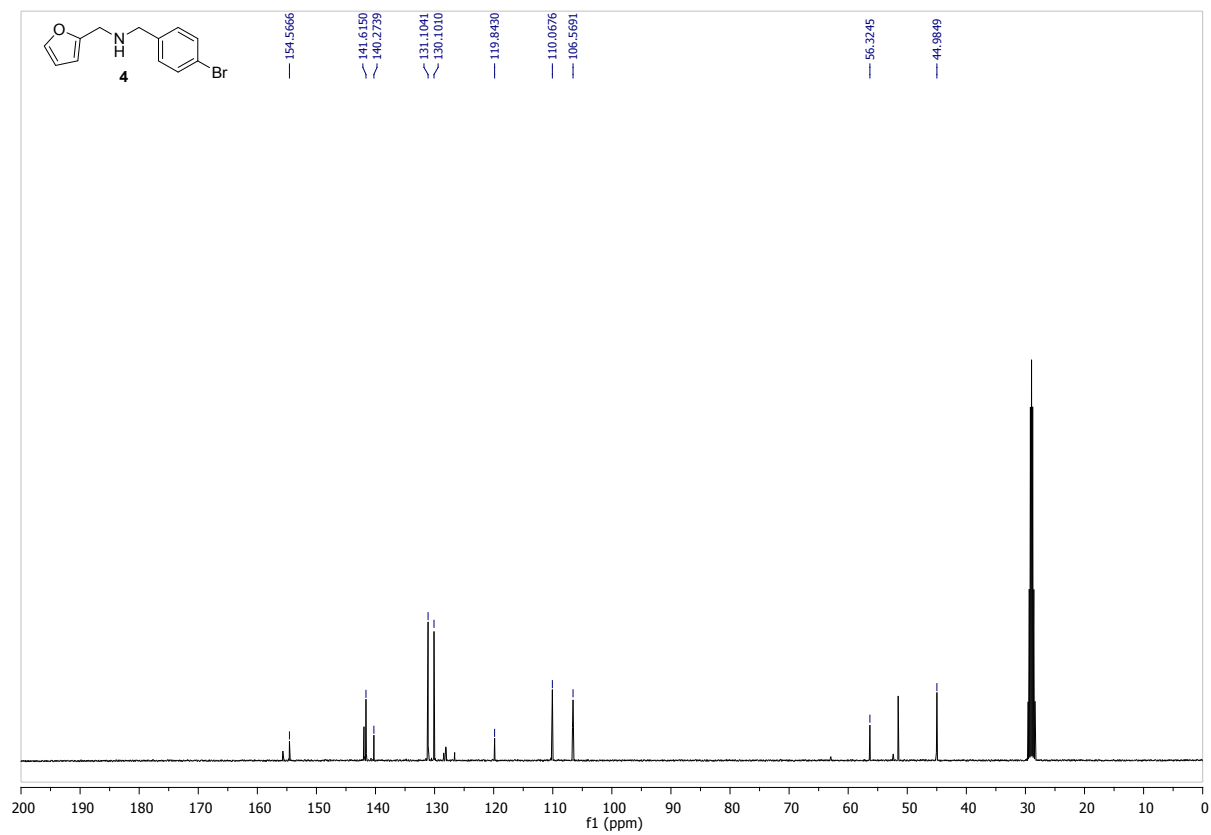

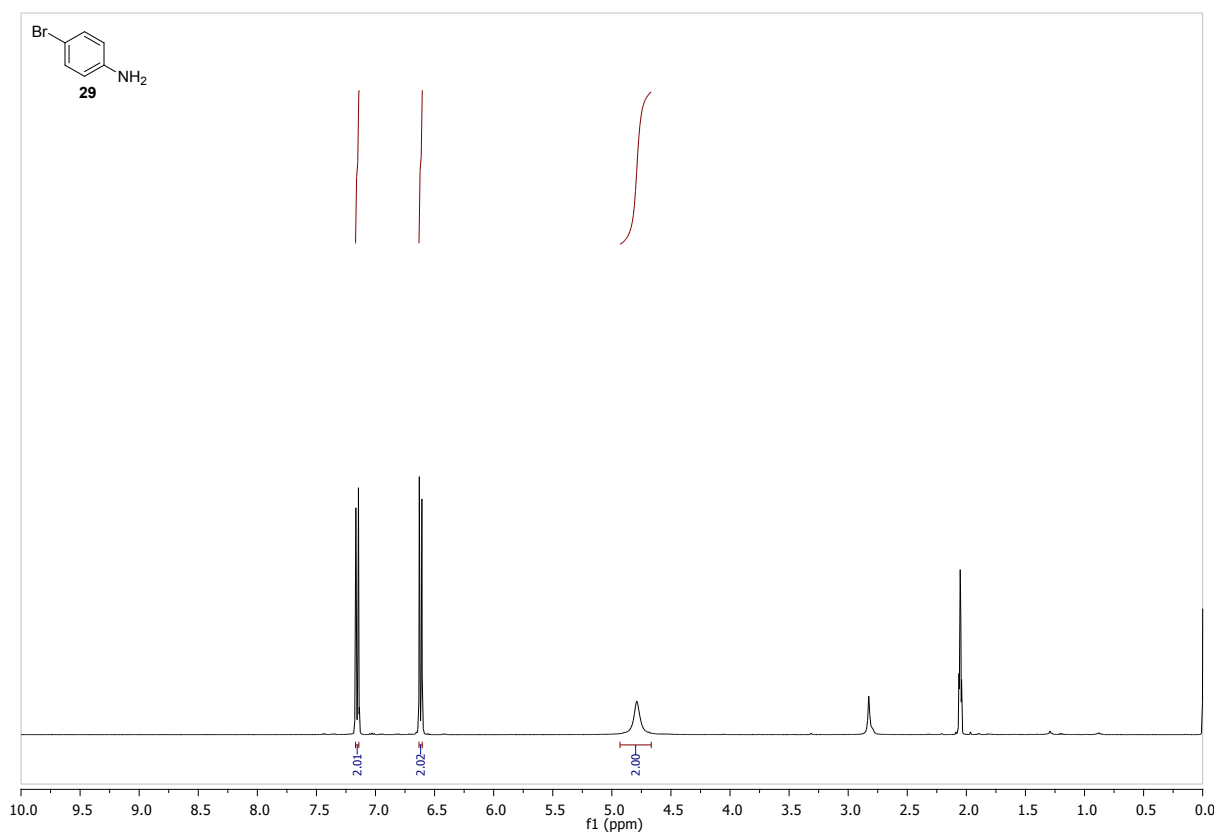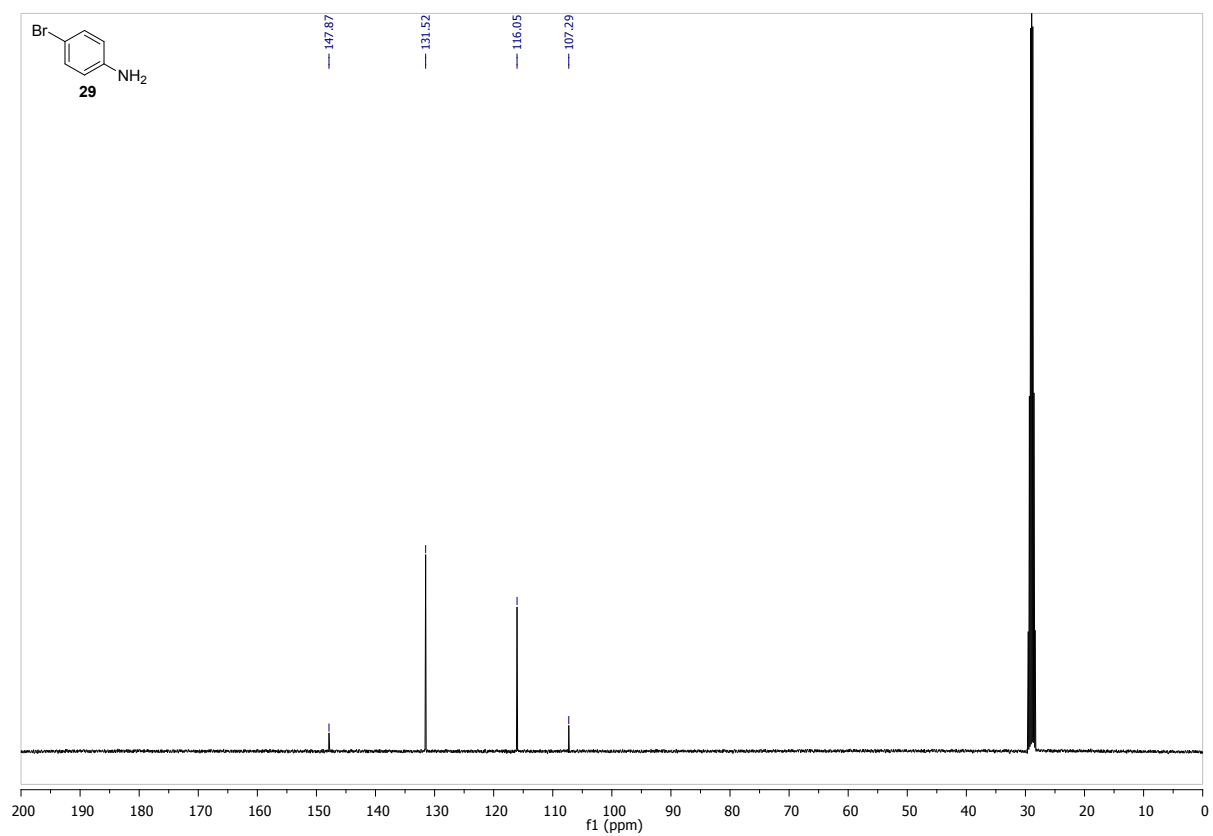

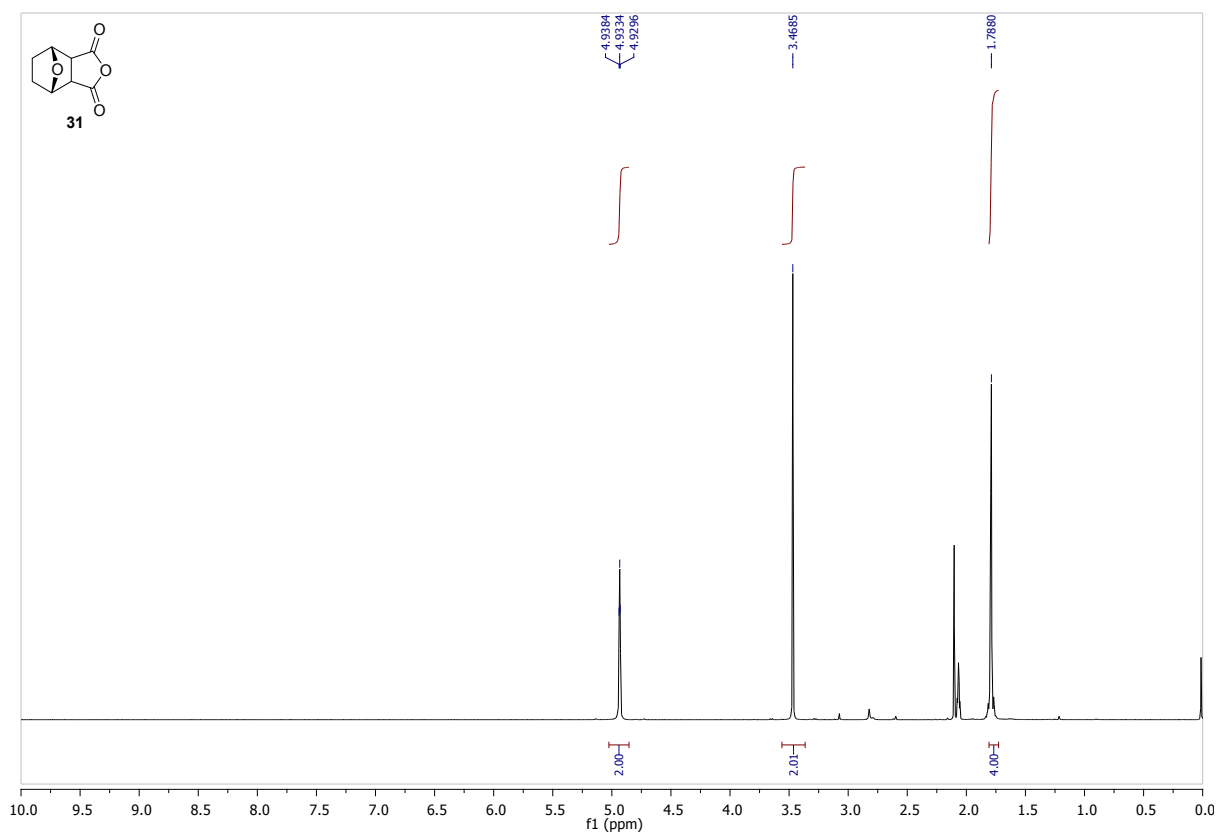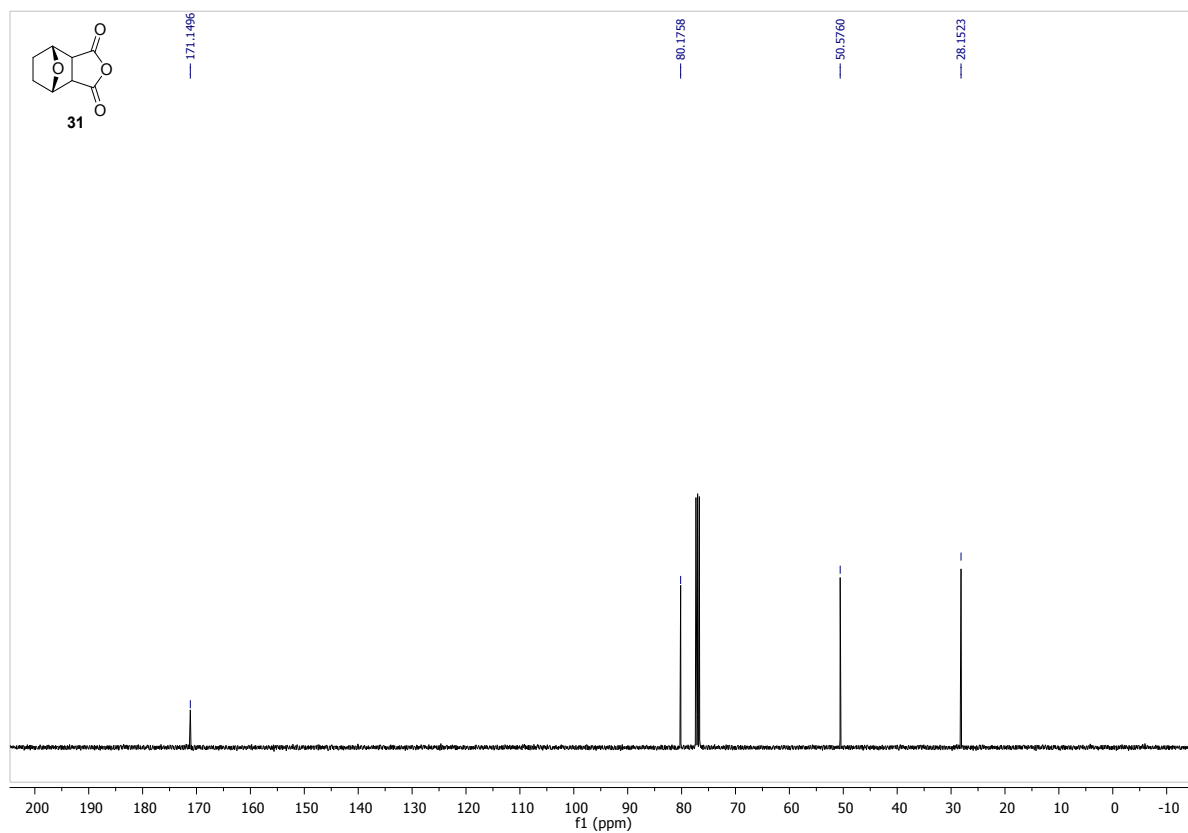

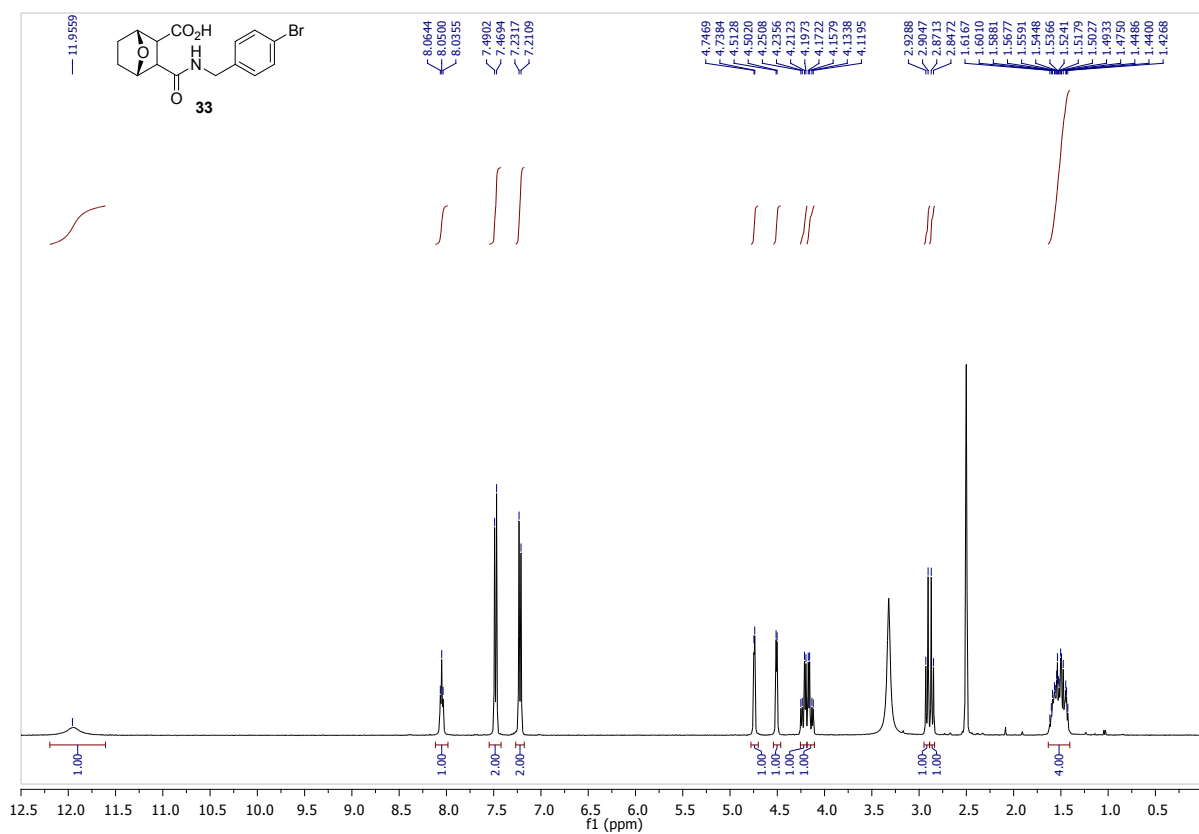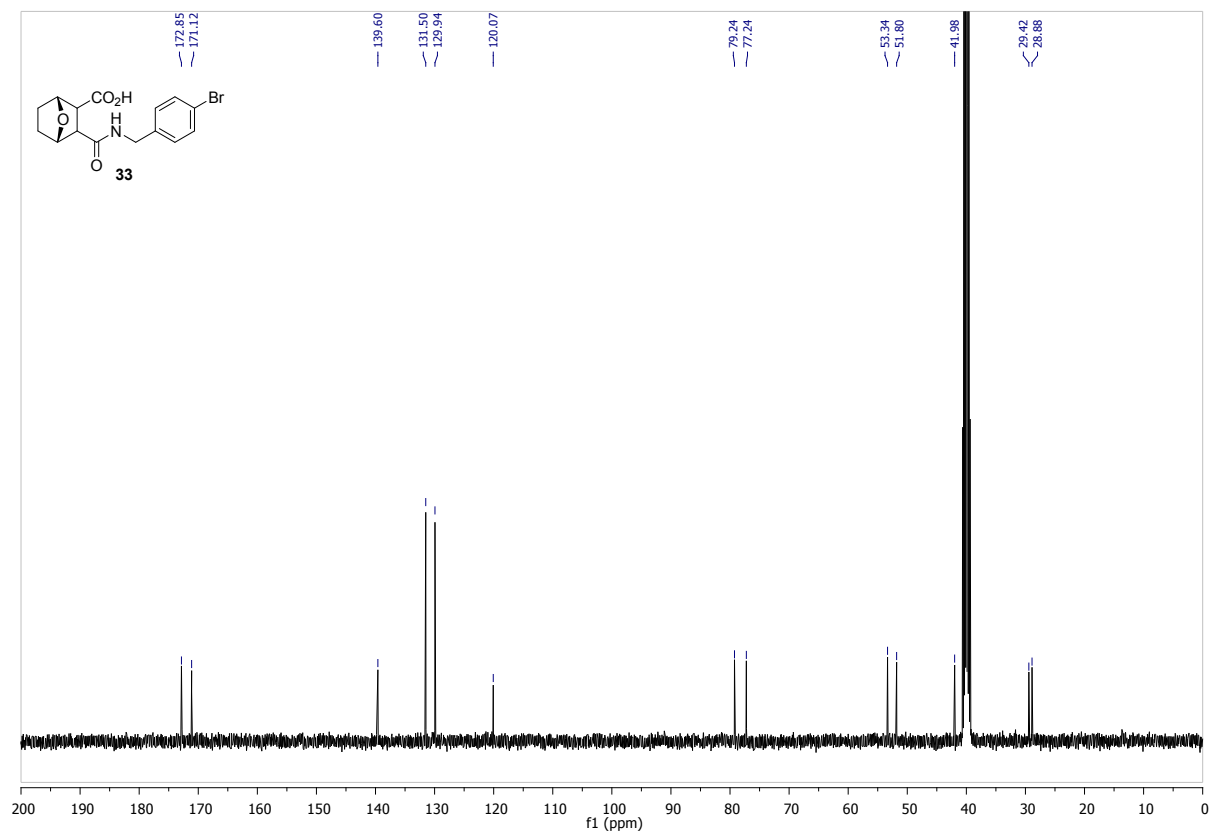

Supplement: c4ra09605c1.pdf [file c4ra09605c1.pdf]
